# Supplementary material
Source: publisher site journal article supplement (https://www.dovepress.com/get_supplementary_file.php?f=366419.docx)
Supplement: Supplementary file 1 [file get_supplementary_file.php]

**Table 1. Reported cases of lymphoepithelioma-like cholangiocarcinoma (as of June 2021, N = 99)**

| **No.** | **Reference** | **Age (years)** | **Sex** | **Race** | **HBV** | **HCV** | **EBV** | **Cirrhosis** | **Location** | **Size (mm)** | **Treatment** | **Outcome** |
| --- | --- | --- | --- | --- | --- | --- | --- | --- | --- | --- | --- | --- |
| 1 | Our case | 55 | M | Asian | - | + | + | + | RL | 51 | MWA | AWOD |
| 2 | Tsai et al.1 | 50* | M | Asian | + | - | + | - | RL | 40 | LR | AWOD |
| 3 |  | 67* | F | Asian | NA | NA | + | - | LL | 30 | LR | AWOD |
| 4 |  | 54 | M | Asian | + | - | - | - | RL | 8 | LR | AWOD |
| 5 |  | 53 | F | Asian | + | - | + | - | RL | 35 | LR | AWOD |
| 6 |  | 72 | F | Asian | - | + | - | + | RL | 30 | LR | AWD |
| 7 |  | 70 | M | Asian | - | + | - | - | RL | 10 | LR | AWOD |
| 8 |  | 53 | M | Asian | NA | NA | + | - | LL | 20 | LR | AWOD |
| 9 |  | 66 | M | Asian | + | - | - | + | RL | 55 | LR | DOD |
| 10 |  | 72 | M | Asian | - | - | + | - | RL | 55 | LR | AWD |
| 11 |  | 57 | F | Asian | + | - | - | + | LL | 52 | LR | DOD |
| 12 |  | 68 | M | Asian | + | - | - | - | RL | 60 | LR | DOD |
| 13 |  | 51 | F | Asian | - | - | + | - | LL | 75 | LR | DOD |
| 14 |  | 63 | F | Asian | - | - | + | - | LL | 118 | LR | DOD |
| 15 |  | 54 | F | Asian | + | - | + | - | LL | 50 | LR | AWOD |
| 16 |  | 74 | F | Asian | - | - | + | - | LL | 40 | LR | AWD |
| 17 |  | 48 | F | Asian | + | - | + | - | RL | 23 | RFA | AWOD |
| 18 |  | 62 | F | Asian | NA | - | - | + | RL | 45 | LR | AWD |
| 19 |  | 64 | F | Asian | - | - | + | - | RL | 100 | LR | DOD |
| 20 |  | 77 | F | Asian | - | + | + | - | RL | 46 | CT | AWD |
| 21 |  | 52 | M | Asian | + | - | - | - | LL | 20 | LR | AWOD |
| 22 |  | 68 | F | Asian | - | - | + | - | RL | 22 | LR | AWOD |
| 23 |  | 68 | M | Asian | - | - | - | - | RL | 25 | LR | DOD |
| 24 |  | 66 | F | Asian | - | + | - | - | LL | 37 | LR | AWOD |
| 25 |  | 64 | F | Asian | - | - | + | - | LL | 60 | LR | AWD |
| 26 |  | 65 | F | Asian | - | - | + | - | RL | 115 | Chemoradiation | AWD |
| 27 |  | 77 | M | Asian | + | - | - | - | RL | 17 | LR | AWOD |
| 28 |  | 43 | M | Asian | + | - | + | - | RL | 23 | RFA | AWOD |
| 29 | Yang et al.2 | 47 | F | Asian | - | - | + | NA | RL | 28 | LR | AWOD |
| 30 |  | 61 | F | Asian | + | - | + | NA | RL | 26 | LR | AWOD |
| 31 |  | 60 | F | Asian | + | - | + | NA | RL | 25 | LR | AWOD |
| 32 |  | 30 | F | Asian | + | - | + | NA | LL | 30 | LR | AWD |
| 33 |  | 53 | F | Asian | + | - | + | NA | LL | 11 | LR | AWOD |
| 34 |  | 33 | F | Asian | + | - | + | NA | RL | 21 | RFA | AWOD |
| 35 |  | 43 | F | Asian | + | - | + | NA | LL | 28 | LR | AWOD |
| 36 |  | 54 | M | Asian | + | - | + | NA | LL | 45 | LR | AWOD |
| 37 |  | 55 | F | Asian | - | - | + | NA | CL | 67 | CT | AWD |
| 38 |  | 63 | F | Asian | - | - | + | NA | CL | 73 | PD inhibitor | AWD |
| 39 |  | 55 | F | Asian | + | - | + | NA | RL | 87 | CT | AWD |
| 40 | Min et al.3 | 46 | M | Asian | + | _ | + | - | NA | 27 | LR | AWD |
| 41 | Nogami et al.4 | 27 | F | Asian | + | - | + | - | RL | 8 | RFA | AWOD |
| 42 | Lin et al.5 | 61 | F | AA | - | - | + | + | RL | 23 | NA | DOD |
| 43 |  | 23 | M | AA | - | - | + | - | RL + LL | NA | CT | DOD |
| 44 | Ding et al.6 | 75 | F | Asian | - | - | + | - | LL | 20 | LR | AWOD |
| 45 | Gearty et al.7 | 28 | F | Asian | + | - | + | - | LL | 68 | CT | DOD |
| 46 | Ling et al.8 | 64 | M | Asian | + | - | + | - | LL | 20 | LR | AWOD |
| 47 |  | 40 | M | Asian | + | - | + | - | LL | 35 | LR | AWOD |
| 48 | Sun et al.9 | 35 | F | Asian | + | - | + | - | RL | 20 | LR | AWOD |
| 49 |  | 66 | M | Asian | - | - | + | - | RL | 73 | NA | DOD |
| 50 |  | 55 | F | Asian | - | - | + | - | LL | 70 | NA | Lost |
| 51 |  | 58 | F | Asian | - | - | + | - | LL | 29 | NA | DOD |
| 52 |  | 54 | M | Asian | + | - | + | - | RL | 37 | NA | DOD |
| 53 |  | 52 | F | Asian | - | - | + | - | LL | 41 | NA | DOD |
| 54 |  | 54 | M | Asian | + | - | + | + | LL | 18 | NA | AWD |
| 55 |  | 30 | F | Asian | + | - | + | - | RL | 30 | NA | AWOD |
| 56 |  | 67 | F | Asian | - | - | + | - | RL | 32 | NA | Lost |
| 57 |  | 51 | F | Asian | + | - | + | - | RL | 31 | NA | Lost |
| 58 |  | 63 | F | Asian | - | - | + | - | RL | 73 | NA | AWD |
| 59 | Wang et al.10 | 60 | M | Asian | + | - | + | - | RL | 60 | LR | DOD |
| 60 |  | 53 | M | Asian | - | - | + | - | RL | 24 | LR | DOD |
| 61 |  | 39 | M | Asian | - | - | - | - | RL | 20 | LR | AWOD |
| 62 |  | 43 | M | Asian | - | - | + | - | RL | 12 | LR | AWOD |
| 63 |  | 62 | M | Asian | + | - | - | - | RL | 32 | LR | AWOD |
| 64 |  | 65 | F | Asian | + | - | - | - | RL | 50 | LR | AWOD |
| 65 |  | 47 | F | Asian | - | - | + | - | LL | 19 | LR | AWOD |
| 66 |  | 52 | M | Asian | + | - | - | - | RL | 19 | LR | AWOD |
| 67 |  | 60 | M | Asian | - | - | + | - | LL | 15 | LR | AWD |
| 68 |  | 61 | M | Asian | + | - | - | - | RL | 24 | LR | AWOD |
| 69 |  | 35 | M | Asian | + | - | + | - | RL | 31 | LR | AWOD |
| 70 |  | 48 | M | Asian | - | - | + | - | RL | 35 | LR | AWOD |
| 71 |  | 71 | F | Asian | - | - | + | - | RL | 22 | LR | AWOD |
| 72 | Labgaa et al.11 | 58 | M | Asian | + | - | + | - | RL + LL | 22 | LR | AWOD |
| 73 | Liao et al.12 | 35 | F | Asian | + | - | + | + | LL | 16 | LR | NA |
| 74 | Wei et al.13 | 45 | F | Asian | + | - | - | - | LL | 47 | LR | AWOD |
| 75 | Aosasa et al.14 | 65 | F | NA | - | + | - | - | LL | 64 | LR | AWOD |
| 76 | Chan et al.15 | 53 | F | Asian | + | - | + | + | RL | 16 | LR | AWOD |
| 77 |  | 40 | F | Asian | + | - | + | - | RL | 75 | LR | AWD |
| 78 |  | 57 | F | Asian | - | - | + | - | LL | 71 | LR | AWOD |
| 79 |  | 56 | F | Asian | - | - | + | - | LL | 60 | LR | DOD |
| 80 |  | 59 | F | Asian | + | - | + | - | LL | 60 | LR | AWOD |
| 81 |  | 45 | F | Asian | - | - | + | - | LL | 30 | LR | AWD |
| 82 |  | 57 | F | Asian | - | - | + | - | RL | 30 | LR | AWOD |
| 83 | Xiao et al.16 | 62 | F | Asian | - | - | + | - | RL | 80 | LR | AWOD |
| 84 |  | 58 | M | Asian | - | - | + | - | LL | 32 | LR | DOD |
| 85 |  | 58 | F | Asian | - | - | + | - | LL | 130 | LR | Recurrence |
| 86 | Hur et al.17 | 57 | F | Asian | - | - | - | - | RL | 20 | LR | AWOD |
| 87 | Lee et al.18 | 79 | F | Asian | + | - | - | + | RL | 35 | LR | AWOD |
| 88 | Henderson-Jackson et al.19 | 63 | F | Asian | - | - | + | - | LL | 40 | LR | AWOD |
| 89 | Adachi et al.20 | 64 | M | Asian | - | - | - | - | LL | 52 | LR | AWOD |
| 90 | Huang et al.21 | 60 | F | Asian | - | - | + | - | LL | 35 | LR | AWOD |
| 91 | Szekely et al.22 | 61 | M | NA | - | - | - | - | NA | 60 | LR | AWOD |
| 92 | Chen et al.23 | 67 | F | Asian | - | - | + | - | RL | 52 | LR | POD |
| 93 |  | 41 | M | Asian | + | - | - | + | LL | 30 | LR | AWOD |
| 94 | Oritz et al.24 | 19 | F | White | - | - | + | - | LL | 55 | LR | DOD |
| 95 | Kim et al.25 | 64 | M | Asian | - | + | - | + | RL | 20 | LR | NA |
| 96 | Vortmeyer et al.26 | 71 | F | White | - | - | + | - | Porta hepatis | 50 | LR + CT | AWD |
| 97 | Jeng et al.27 | 42 | M | Asian | - | - | + | - | RL | 30 | LR | AWOD |
| 98 |  | 50 | F | Asian | - | - | + | - | LL | 40 | LR | AWOD |
| 99 | Hsu et al.28 | 47 | F | Asian | - | - | + | - | RL | 120 | LR | DOD |

F = female, M = male, AA = African American, CT = chemotherapy, LR = liver resection, NA = not available, RFA = radio frequency ablation, RL = right lobe, LL = left lobe, CL = caudate lobe, AWOD = alive without disease, AWD = alive with disease, DOD = death of disease, POD = post-operative death, Lost = lost to follow-up

*Cases 2 and 3 were reported by both Jeng et al. and in Tsai. et al. but are included only once in the table.

**Reference**

1 Tsai, J. H., Liau, J. Y., Lee, C. H. & Jeng, Y. M. Lymphoepithelioma-like Intrahepatic Cholangiocarcinoma Is a Distinct Entity With Frequent pTERT/TP53 Mutations and Comprises 2 Subgroups Based on Epstein-Barr Virus Infection. *The American journal of surgical pathology*, doi:10.1097/pas.0000000000001716 (2021).

2 Yang, Q. *et al.* The CT and MRI Features of Primary Intrahepatic Lymphoepithelioma-Like Cholangiocarcinoma. *AJR. American journal of roentgenology* **216**, 393-402, doi:10.2214/ajr.20.22937 (2021).

3 Min, H. S., Shin, E. & Jang, J. J. [Carcinoma with predominant lymphoid stroma in hepatobiliary system--report of 2 cases]. *The Korean journal of hepatology* **13**, 222-227 (2007).

4 Nogami, A. *et al.* Lymphoepithelioma-like cholangiocarcinoma with Epstein-Barr virus infection treated by radiofrequency ablation. *Clinical journal of gastroenterology* **14**, 638-644, doi:10.1007/s12328-020-01303-4 (2021).

5 Lin, A., Alpert, L., Hart, J., Chapman, C. & Pillai, A. A. Lymphoepithelioma-Like Carcinomas: A Rare Variant of Cholangiocarcinoma. *Hepatology (Baltimore, Md.)* **72**, 353-355, doi:10.1002/hep.31102 (2020).

6 Ding, Y. *et al.* Lymphoepithelioma-like intrahepatic cholangiocarcinoma with Epstein-Barr virus infection: report of a rare case. *Annals of translational medicine* **7**, 497, doi:10.21037/atm.2019.08.105 (2019).

7 Gearty, S. V., Al Jurdi, A., Pittman, M. E. & Gupta, R. An EBV+ lymphoepithelioma-like cholangiocarcinoma in a young woman with chronic hepatitis B. *BMJ case reports* **12**, doi:10.1136/bcr-2019-229520 (2019).

8 Ling, W. *et al.* Ultrasonographic findings of intrahepatic lymphoepithelioma-like cholangiocarcinoma associated with Epstein-Barr virus: Two cases report. *Medicine* **98**, e14206, doi:10.1097/md.0000000000014206 (2019).

9 Sun, K. *et al.* Clinicopathological features of 11 Epstein-Barr virus-associated intrahepatic cholangiocarcinoma at a single center in China. *Medicine* **95**, e5069, doi:10.1097/md.0000000000005069 (2016).

10 Wang, L. *et al.* Programmed death-ligand 1 is upregulated in intrahepatic lymphoepithelioma-like cholangiocarcinoma. *Oncotarget* **7**, 69749-69759, doi:10.18632/oncotarget.11949 (2016).

11 Labgaa, I., Hiotis, S. & Ward, S. C. Lymphoepithelioma-Like Cholangiocarcinoma: A Rare Finding With Good Outcomes. *Journal of clinical gastroenterology* **50**, 268, doi:10.1097/mcg.0000000000000456 (2016).

12 Liao, T. C., Liu, C. A., Chiu, N. C., Yeh, Y. C. & Chiou, Y. Y. Lymphoepithelioma-like cholangiocarcinoma: a mimic of hepatocellular carcinoma on imaging features. *World journal of gastroenterology* **21**, 4089-4095, doi:10.3748/wjg.v21.i13.4089 (2015).

13 Wei, J., Liu, Q., Wang, C. & Yu, S. Lymphoepithelioma-like hepatocellular carcinoma without Epstein-Barr virus infection: A case report and a review of the literature. *Indian journal of pathology & microbiology* **58**, 550-553, doi:10.4103/0377-4929.168857 (2015).

14 Aosasa, S. *et al.* Intrahepatic Cholangiocarcinoma With Lymphoepithelioma-like Carcinoma Components Not Associated With Epstein-Barr Virus: Report of a Case. *International surgery* **100**, 689-695, doi:10.9738/intsurg-d-14-00117.1 (2015).

15 Chan, A. W., Tong, J. H., Sung, M. Y., Lai, P. B. & To, K. F. Epstein-Barr virus-associated lymphoepithelioma-like cholangiocarcinoma: a rare variant of intrahepatic cholangiocarcinoma with favourable outcome. *Histopathology* **65**, 674-683, doi:10.1111/his.12455 (2014).

16 Xiao, P. *et al.* Epstein-Barr virus-associated intrahepatic cholangiocarcinoma bearing an intense lymphoplasmacytic infiltration. *Journal of clinical pathology* **65**, 570-573, doi:10.1136/jclinpath-2011-200581 (2012).

17 Hur, Y. H., Kim, H. H., Koh, Y. S., Seoung, J. S. & Cho, C. K. Lymphoepithelioma-like cholangiocarcinoma not associated with Epstein-Barr virus. *ANZ journal of surgery* **81**, 652-653, doi:10.1111/j.1445-2197.2011.05840.x (2011).

18 Lee, W. Intrahepatic lymphoepithelioma-like cholangiocarcinoma not associated with epstein-barr virus: a case report. *Case reports in oncology* **4**, 68-73, doi:10.1159/000324485 (2011).

19 Henderson-Jackson, E., Nasir, N. A., Hakam, A., Nasir, A. & Coppola, D. Primary mixed lymphoepithelioma-like carcinoma and intra-hepatic cholangiocarcinoma: a case report and review of literature. *International journal of clinical and experimental pathology* **3**, 736-741 (2010).

20 Adachi, S., Morimoto, O. & Kobayashi, T. Lymphoepithelioma-like cholangiocarcinoma not associated with EBV. *Pathology international* **58**, 69-74, doi:10.1111/j.1440-1827.2007.02192.x (2008).

21 Huang, Y., Tsung, J. S., Lin, C. W. & Cheng, T. Y. Intrahepatic cholangiocarcinoma with lymphoepithelioma-like carcinoma component. *Annals of clinical and laboratory science* **34**, 476-480 (2004).

22 Szekely, E. Lymphoepithelioma-like cholangiocarcinoma (LELC) not associated with Epstein-Barr virus. *The American journal of surgical pathology* **25**, 1464-1466, doi:10.1097/00000478-200111000-00023 (2001).

23 Chen, T. C., Ng, K. F. & Kuo, T. Intrahepatic cholangiocarcinoma with lymphoepithelioma-like component. *Modern pathology : an official journal of the United States and Canadian Academy of Pathology, Inc* **14**, 527-532, doi:10.1038/modpathol.3880342 (2001).

24 Ortiz, M. R. *et al.* Epstein-Barr Virus-Associated Cholangiocarcinoma with Lymphoepithelioma-Like Component. *International journal of surgical pathology* **8**, 347-351, doi:10.1177/106689690000800418 (2000).

25 Kim, Y. B., Park, Y. N., Han, J. Y., Hong, K. C. & Hwang, T. S. Biliary lymphoepithelioma-like carcinoma not associated with Epstein-Barr virus. *Archives of pathology & laboratory medicine* **123**, 441-443, doi:10.5858/1999-123-0441-bllcna (1999).

26 Vortmeyer, A. O. *et al.* Hepatobiliary lymphoepithelioma-like carcinoma associated with Epstein-Barr virus. *American journal of clinical pathology* **109**, 90-95, doi:10.1093/ajcp/109.1.90 (1998).

27 Jeng, Y. M., Chen, C. L. & Hsu, H. C. Lymphoepithelioma-like cholangiocarcinoma: an Epstein-Barr virus-associated tumor. *The American journal of surgical pathology* **25**, 516-520, doi:10.1097/00000478-200104000-00012 (2001).

28 Hsu, H. C., Chen, C. C., Huang, G. T. & Lee, P. H. Clonal Epstein-Barr virus associated cholangiocarcinoma with lymphoepithelioma-like component. *Human pathology* **27**, 848-850, doi:10.1016/s0046-8177(96)90460-8 (1996).
